# Supplementary material
Source: publisher site journal article supplement (https://www.dovepress.com/article/308029)
Supplement: Supplementary file 1 [file get_supplementary_file.php]

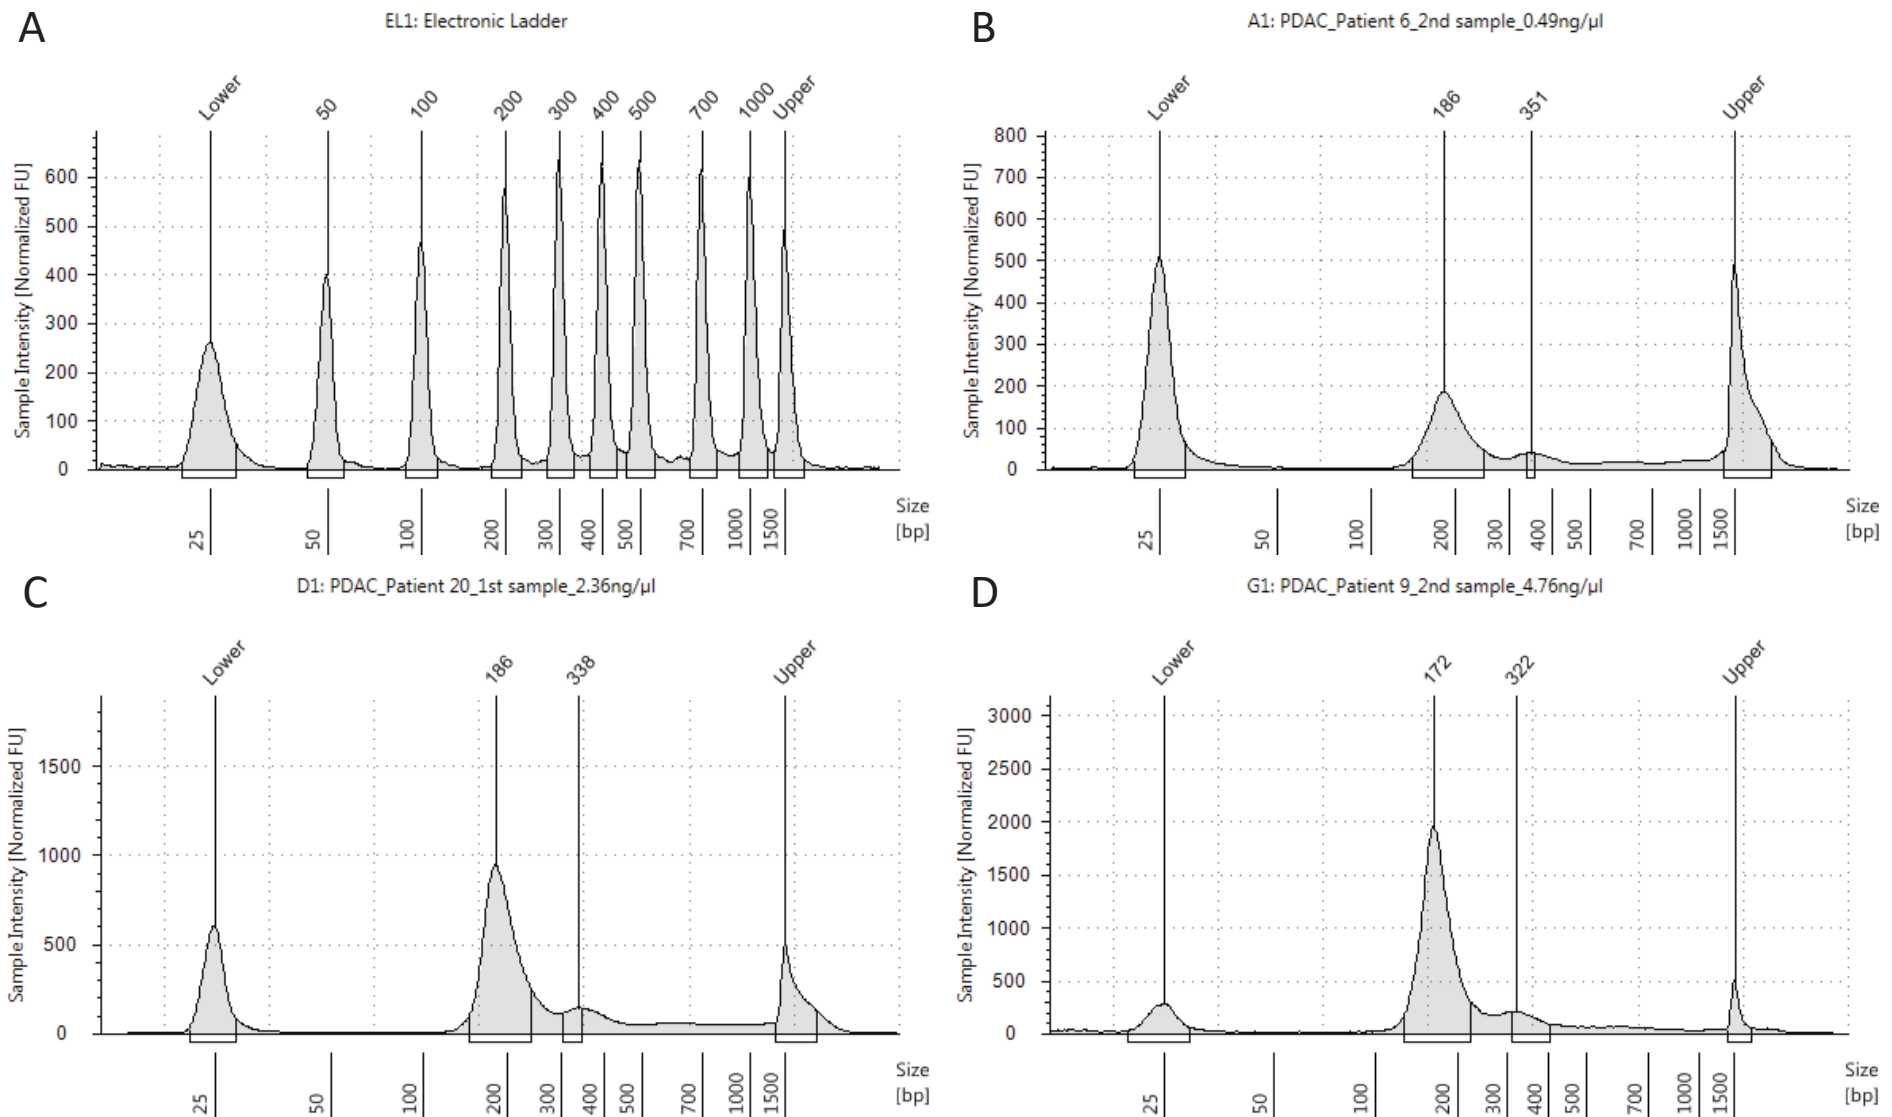

Supplementary Figure S1

Quality control of extracted cfDNA with TapeStation system. The electropherogram profiles are showing the electronic ladder (internal reference) (A) and three representative PDAC samples in the range of 0.49-4.76ng/μl (B-D). These PDAC samples are showing a broad peak at ~180bp, which represents the mononucleosomal fragment and a less abundant dinucleosomal fragment at ~330bp. There is little to no genomic DNA contamination detectable.

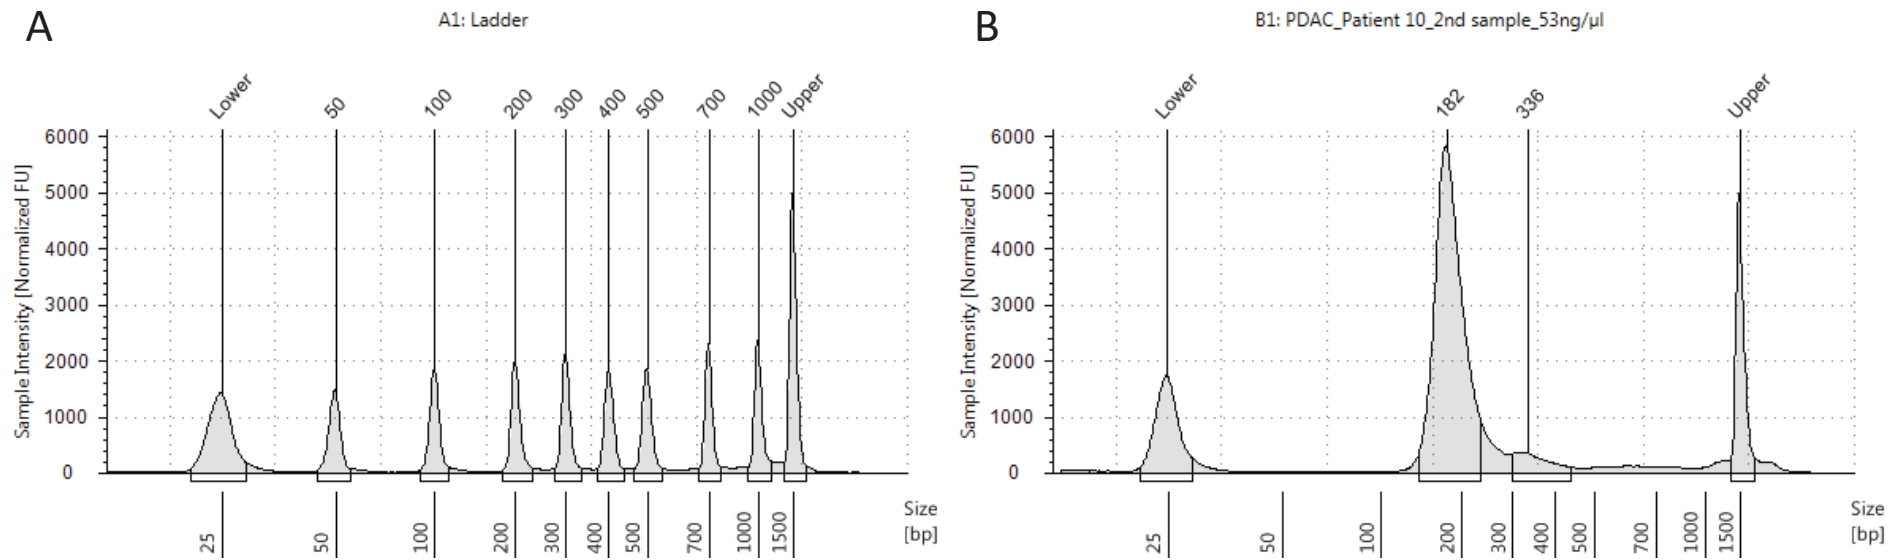

### Supplementary Figure S2

Quality control of cfDNA with 53ng/μl concentration with TapeStation System. The electropherogram profiles are showing the ladder (internal reference) (A) and the cfDNA sample with 53ng/μl concentration (B). Despite of the high concentration, the electropherogram profile of this cfDNA reveals little to no genomic DNA contamination and shows a broad peak at ~180bp and a less abundant peak at ~330bp.

**Supplementary Table S1: Pathogenic variants detected with GP15**

| Patient # | Sample     | Gene Symbol | Amino Acid Change | Variant Frequency (%) | Detection threshold controls (GP15) | Codon Change        |
|-----------|------------|-------------|-------------------|-----------------------|-------------------------------------|---------------------|
| 1         | 1st sample | KRAS        | p.G12D            | 4.43                  | 0.053                               | c.35G>A             |
|           | 2nd sample | KRAS        | p.G12D            | 2.01                  | 0.053                               | c.35G>A             |
| 2         | 1st sample | PIK3CA      | p.Q546L           | 4.40                  | 0.000                               | c.1637A>T           |
|           |            | KRAS        | p.G12V            | 6.96                  | 0.000                               | c.35G>T             |
|           |            | TP53        | p.R273H           | 1.91                  | 0.050                               | c.818G>A            |
|           | 2nd sample | PIK3CA      | p.Q546L           | 0.00                  | 0.000                               | c.1637A>T           |
|           |            | KRAS        | p.G12V            | 0.00                  | 0.000                               | c.35G>T             |
|           |            | TP53        | p.R273H           | 0.00                  | 0.050                               | c.818G>A            |
| 3         | 1st sample | PIK3CA      | p.G1007V          | 0.25                  | 0.104                               | c.3020G>T           |
|           |            | EGFR        | p.Q791H           | 0.22                  | 0.023                               | c.2373G>T           |
|           |            | PDGFRA      | p.L839P           | 0.00                  | 0.034                               | c.2516T>C           |
|           | 2nd sample | PIK3CA      | p.G1007V          | 1.58                  | 0.104                               | c.3020G>T           |
|           |            | EGFR        | p.Q791H           | 1.50                  | 0.023                               | c.2373G>T           |
|           |            | PDGFRA      | p.L839P           | 1.25                  | 0.034                               | c.2516T>C           |
| 4         | 1st sample | KRAS        | p.G12R            | 1.37                  | 0.015                               | c.34G>C             |
|           |            | TP53        | p.D208V           | 1.82                  | 0.000                               | c.623_624delACinsTT |
|           | 2nd sample | KRAS        | p.G12R            | 0.19                  | 0.015                               | c.34G>C             |
|           |            | TP53        | p.D208V           | 0.33                  | 0.000                               | c.623_624delACinsTT |
| 5         | 1st sample | MET         | p.G1201V          | 2.06                  | 0.212                               | c.3602G>T           |
|           | 2nd sample | MET         | p.G1201V          | 0.00                  | 0.212                               | c.3602G>T           |
| 6         | 1st sample | /           |                   |                       |                                     |                     |
|           | 2nd sample | /           |                   |                       |                                     |                     |
| 7         | 1st sample | KRAS        | p.G12D            | 4.54                  | 0.053                               | c.35G>A             |
|           |            | TP53        | p.P152T           | 1.66                  | 0.000                               | c.454C>A            |
|           |            | KRAS        | p.A146T           | 0.19                  | 0.049                               | c.437C>T            |
|           | 2nd sample | KRAS        | p.G12D            | 0.09                  | 0.053                               | c.35G>A             |
|           |            | TP53        | p.P152T           | 0.00                  | 0.000                               | c.454C>A            |
|           |            | KRAS        | p.A146T           | 0.15                  | 0.049                               | c.437C>T            |
| 8         | 1st sample | KRAS        | p.G12V            | 0.79                  | 0.000                               | c.35G>T             |
|           | 2nd sample | KRAS        | p.G12V            | 0.17                  | 0.000                               | c.35G>T             |
| 9         | 1st sample | /           |                   |                       |                                     |                     |
|           | 2nd sample | /           |                   |                       |                                     |                     |
| 10        | 1st sample | KRAS        | p.G12V            | 0.87                  | 0.000                               | c.35G>T             |
|           | 2nd sample | KRAS        | p.G12V            | 0.43                  | 0.000                               | c.35G>T             |
| 11        | 1st sample | KRAS        | p.G12D            | 0.41                  | 0.053                               | c.35G>A             |
|           | 2nd sample | KRAS        | p.G12D            | 0.12                  | 0.053                               | c.35G>A             |

|    |            |      |               |       |       |                |
|----|------------|------|---------------|-------|-------|----------------|
| 12 | 1st sample | KRAS | p.A146T       | 0.24  | 0.049 | c.437C>T       |
|    | 2nd sample | KRAS | p.A146T       | 0.00  | 0.049 | c.437C>T       |
| 13 | 1st sample | KRAS | p.Q61R        | 21.73 | 0.037 | c.182A>G       |
|    |            | TP53 | p.F212SfsTer3 | 16.58 | 0.000 | c.635_636delTT |
|    | 2nd sample | KRAS | p.Q61R        | 8.04  | 0.037 | c.182A>G       |
|    |            | TP53 | p.F212SfsTer3 | 2.90  | 0.000 | c.635_636delTT |
| 14 | 1st sample | KRAS | p.G12R        | 15.18 | 0.015 | c.34G>C        |
|    |            | TP53 | p.G245V       | 16.74 | 0.000 | c.734G>T       |
|    | 2nd sample | KRAS | p.G12R        | 0.87  | 0.015 | c.34G>C        |
|    |            | TP53 | p.G245V       | 1.67  | 0.000 | c.734G>T       |
| 15 | 1st sample | KRAS | p.A134S       | 0.00  | 0.000 | c.400G>T       |
|    |            | TP53 | p.Y126D       | 1.41  | 0.009 | c.376T>G       |
|    | 2nd sample | KRAS | p.A134S       | 1.47  | 0.000 | c.400G>T       |
|    |            | TP53 | p.Y126D       | 0.36  | 0.009 | c.376T>G       |
| 16 | 1st sample | KRAS | p.G12D        | 2.79  | 0.053 | c.35G>A        |
|    |            | TP53 | p.R282W       | 1.32  | 0.090 | c.844C>T       |
|    | 2nd sample | KRAS | p.G12D        | 1.83  | 0.053 | c.35G>A        |
|    |            | TP53 | p.R282W       | 1.10  | 0.090 | c.844C>T       |
| 17 | 1st sample | KRAS | p.G12R        | 0.85  | 0.015 | c.34G>C        |
|    | 2nd sample | KRAS | p.G12R        | 0.00  | 0.015 | c.34G>C        |
| 18 | 1st sample | /    |               |       |       |                |
|    | 2nd sample | /    |               |       |       |                |
| 19 | 1st sample | /    |               |       |       |                |
|    | 2nd sample | /    |               |       |       |                |
| 20 | 1st sample | /    |               |       |       |                |
|    | 2nd sample | /    |               |       |       |                |
| 21 | 1st sample | KRAS | p.G12D        | 0.46  | 0.053 | c.35G>A        |
|    | 2nd sample | KRAS | p.G12D        | 0.08  | 0.053 | c.35G>A        |

**Supplementary Table S2: Pathogenic variants detected with GP50**

| Patient # | Sample     | Gene Symbol | Amino Acid Change | Variant Frequency (%) | Detection threshold controls (GP50) | Codon Change        |
|-----------|------------|-------------|-------------------|-----------------------|-------------------------------------|---------------------|
| 1         | 1st sample | KRAS        | p.G12D            | 3.40                  | 0.045                               | c.35G>A             |
|           |            | SMAD4       | p.Y131D           | 1.84                  | 0.008                               | c.392A>G            |
|           | 2nd sample | KRAS        | p.G12D            | 0.00                  | 0.045                               | c.35G>A             |
|           |            | SMAD4       | p.Y131D           | 0.00                  | 0.008                               | c.392A>G            |
| 2         | 1st sample | PIK3CA      | p.Q546L           | 4.17                  | 0.040                               | c.1637A>T           |
|           |            | KRAS        | p.G12V            | 5.91                  | 0.000                               | c.35G>T             |
|           |            | TP53        | p.R273H           | 4.71                  | 0.086                               | c.818G>A            |
|           |            | SMAD4       | p.Q256*           | 0.00                  | 0.061                               | c.766C>T            |
|           | 2nd sample | PIK3CA      | p.Q546L           | 0.00                  | 0.040                               | c.1637A>T           |
|           |            | KRAS        | p.G12V            | 0.00                  | 0.000                               | c.35G>T             |
|           |            | TP53        | p.R273H           | 0.00                  | 0.086                               | c.818G>A            |
|           |            | SMAD4       | p.Q256*           | 0.56                  | 0.061                               | c.766C>T            |
| 3         | 1st sample | /           |                   |                       |                                     |                     |
|           | 2nd sample | /           |                   |                       |                                     |                     |
| 4         | 1st sample | KRAS        | p.G12R            | 3.34                  | 0.006                               | c.34G>C             |
|           |            | TP53        | p.D208V           | 1.32                  | 0.000                               | c.623_624delACinsTT |
|           | 2nd sample | KRAS        | p.G12R            | 0.00                  | 0.006                               | c.34G>C             |
|           |            | TP53        | p.D208V           | 0.45                  | 0.000                               | c.623_624delACinsTT |
| 5         | 1st sample | SMAD4       | p.R496H           | 0.00                  | 0.035                               | c.1487G>A           |
|           | 2nd sample | SMAD4       | p.R496H           | 0.43                  | 0.035                               | c.1487G>A           |
| 6         | 1st sample | SMAD4       | p.R445*           | 0.17                  | 0.062                               | c.1333C>T           |
|           |            | CDKN2A      | p.Y129C           | 0.23                  | 0.029                               | c.385A>G            |
|           | 2nd sample | SMAD4       | p.R445*           | 0.24                  | 0.062                               | c.1333C>T           |
|           |            | CDKN2A      | p.Y129C           | 0.48                  | 0.029                               | c.385A>G            |
| 7         | 1st sample | KRAS        | p.G12D            | 2.40                  | 0.045                               | c.35G>A             |
|           |            | TP53        | p.P152T           | 1.51                  | 0.054                               | c.454C>A            |
|           | 2nd sample | KRAS        | p.G12D            | 0.00                  | 0.045                               | c.35G>A             |
|           |            | TP53        | p.P152T           | 0.00                  | 0.054                               | c.454C>A            |
| 8         | 1st sample | KRAS        | p.G12V            | 1.01                  | 0.000                               | c.35G>T             |
|           | 2nd sample | KRAS        | p.G12V            | 0.00                  | 0.000                               | c.35G>T             |
| 9         | 1st sample | /           |                   |                       |                                     |                     |
|           | 2nd sample | /           |                   |                       |                                     |                     |
| 10        | 1st sample | KRAS        | p.G12V            | 0.25                  | 0.000                               | c.35G>T             |
|           | 2nd sample | KRAS        | p.G12V            | 0.96                  | 0.000                               | c.35G>T             |
| 11        | 1st sample | KRAS        | p.G12D            | 0.22                  | 0.045                               | c.35G>A             |
|           | 2nd sample | KRAS        | p.G12D            | 0.00                  | 0.045                               | c.35G>A             |

|    |            |        |               |       |       |                |  |
|----|------------|--------|---------------|-------|-------|----------------|--|
| 12 | 1st sample | /      |               |       |       |                |  |
|    | 2nd sample | /      |               |       |       |                |  |
| 13 | 1st sample | KRAS   | p.Q61R        | 23.41 | 0.149 | c.182A>G       |  |
|    |            | TP53   | p.F212SfsTer3 | 17.22 | 0.000 | c.635_636delTT |  |
|    | 2nd sample | KRAS   | p.Q61R        | 9.21  | 0.149 | c.182A>G       |  |
|    |            | TP53   | p.F212SfsTer3 | 4.65  | 0.000 | c.635_636delTT |  |
| 14 | 1st sample | KRAS   | p.G12R        | 15.94 | 0.006 | c.34G>C        |  |
|    |            | TP53   | p.G245V       | 16.13 | 0.057 | c.734G>T       |  |
|    | 2nd sample | KRAS   | p.G12R        | 1.55  | 0.006 | c.34G>C        |  |
|    |            | TP53   | p.G245V       | 0.87  | 0.057 | c.734G>T       |  |
| 15 | 1st sample | TP53   | p.Y126D       | 0.94  | 0.014 | c.376T>G       |  |
|    | 2nd sample | TP53   | p.Y126D       | 0.33  | 0.014 | c.376T>G       |  |
| 16 | 1st sample | KRAS   | p.G12D        | 2.75  | 0.045 | c.35G>A        |  |
|    |            | TP53   | p.R282W       | 1.83  | 0.088 | c.844C>T       |  |
|    | 2nd sample | KRAS   | p.G12D        | 1.58  | 0.045 | c.35G>A        |  |
|    |            | TP53   | p.R282W       | 1.38  | 0.088 | c.844C>T       |  |
| 17 | 1st sample | TP53   | p.R282W       | 0.47  | 0.088 | c.34G>C        |  |
|    |            | CDKN2A | p.Y129C       | 0.40  | 0.029 | c.385A>G       |  |
|    | 2nd sample | TP53   | p.R282W       | 0.00  | 0.088 | c.34G>C        |  |
|    |            | CDKN2A | p.Y129C       | 0.00  | 0.029 | c.385A>G       |  |
| 18 | 1st sample | /      |               |       |       |                |  |
|    | 2nd sample | /      |               |       |       |                |  |
| 19 | 1st sample | TP53   | p.R282W       | 0.43  | 0.088 |                |  |
|    | 2nd sample | TP53   | p.R282W       | 0.00  | 0.088 |                |  |
| 20 | 1st sample | /      |               |       |       |                |  |
|    | 2nd sample | /      |               |       |       |                |  |
| 21 | 1st sample | SMAD4  | p.R135*       | 0.64  | 0.073 | c.403C>T       |  |
|    | 2nd sample | SMAD4  | p.R135*       | 0.00  | 0.073 | c.403C>T       |  |
